# Supplementary material for: Characterization of BAT activity in rats using invasive and non-invasive techniques
Source: PLoS One. 2019 May 15;14(5):e0215852. doi: 10.1371/journal.pone.0215852 (PMC6519816; doi:10.1371/journal.pone.0215852)
Supplement: S1 Dataset — (XLS) [file pone.0215852.s004.xls]

## Sheet: Sheet1
												Conversiefactor		934000000
												u-SPECT ==> Bq
BAT volume on uPET/uSPECT (in cc)								BAT SUV on uPET/uSPECT (in cc)							Total metabolic BAT activity						p-values on volume							p-values on SUV							p-values on total metabolic activity
FDG	RT	Acute cold	Acclim cold	Uptake in cold			FDG	RT	Acute cold	Acclim cold	Uptake in cold			FDG	RT	Acute cold	Acclim cold	Uptake in cold			FDG	RT	Acute cold	Acclim cold	Uptake in cold			FDG	RT	Acute cold	Acclim cold	Uptake in cold			FDG	RT	Acute cold	Acclim cold	Uptake in cold
Rat1	0.263115	0.195696	0.706413	0.53697			Rat1	1.17156	5.26939	0.880755	2.19979			Rat1	0.308254	1.0312	0.622177	1.18122			vs RT		0.883468	0.0213947	0.0191521			vs RT		0.11236	0.221611	0.234478			vs RT		0.0306561	0.0574662	0.0995851
Rat2	0.205838	0.247006	0.495205	0.523844			Rat2	1.64883	2.21789	6.22699	6.62694			Rat2	0.339392	0.547833	3.08364	3.47148			vs acute			0.184979	0.176769			vs acute			0.9404	0.98174			vs acute			0.173344	0.234433
Rat3	0.300703	0.245216	0.613935	0.452248			Rat3	2.22099	4.07982	2.20293	0.850064			Rat3	0.667859	1.00044	1.35246	0.384439			vs acclim				0.465962			vs acclim				0.965398			vs acclim				0.935941
Rat4	0.538759	0.706413	0.554892	0.662209			Rat4	1.11671	1.39762	3.20598	3.14338				0.60164	0.987297	1.77898	2.08157
Average	0.327104	0.348583	0.592611	0.543818			Average	1.53952	3.24118	3.10356	3.2256			Average	0.479286	0.891691	1.70931	1.77968
SEM	0.0731978	0.119868	0.0611273	0.0263271			SEM	0.256664	0.878577	1.39229	1.51098			SEM	0.090991	0.114988	0.516626	0.661953
MIBG	RT	Acute cold	Acclim cold	Uptake in cold			MIBG	RT	Acute cold	Acclim cold	Uptake in cold			MIBG	RT	Acute cold	Acclim cold	Uptake in cold			MIBG	RT	Acute cold	Acclim cold	Uptake in cold			MIBG	RT	Acute cold	Acclim cold	Uptake in cold			MIBG	RT	Acute cold	Acclim cold	Uptake in cold
Rat1	0.115008	0.115968	0.528768	0.35424			Rat1	1.44316e-09	3.55523e-09	1.64596e-09	1.67755e-09			Rat1	1.65975e-10	4.12293e-10	8.7033e-10	5.94257e-10			vs RT		0.078399	0.00438263	0.00354117			vs RT		0.000643846	0.0640675	0.0120817			vs RT		0.00301817	0.00361921	0.000517041
Rat2	0.073216	0.143232	0.435456				Rat2	7.72127e-10	3.05545e-09	2.62436e-09	1.90986e-09			Rat2	5.65321e-11	4.37638e-10	1.14279e-09				vs acute			0.00499419	0.0105382			vs acute			0.0440477	0.000827668			vs acute			0.0394503	0.318391
Rat3	0.043072	0.218112	0.393984	0.262656			Rat3	5.36307e-10	3.04741e-09	1.38173e-09	2.26528e-09			Rat3	2.30998e-11	6.64678e-10	5.44381e-10	5.9499e-10			vs acclim				0.173032			vs acclim				0.578344			vs acclim				0.116365
Rat4		0.121408	0.266112	0.273024			Rat4		3.84773e-09	3.16548e-09	1.94426e-09			Rat4		4.67145e-10	8.42373e-10	5.30829e-10
Average	0.0770987	0.14968	0.40608	0.29664			Average	9.17199e-10	3.37645e-09	2.20438e-09	1.94924e-09			Average	8.18691e-11	4.95438e-10	8.4997e-10	5.73359e-10
SEM	0.0180624	0.023559	0.0545074	0.0250759			SEM	2.35256e-10	1.96929e-10	4.17201e-10	1.20855e-10			SEM	3.73658e-11	5.75156e-11	1.22339e-10	1.84167e-11
MIBI	RT	Acute cold	Acclim cold	Uptake in cold			MIBI	RT	Acute cold	Acclim cold	Uptake in cold			MIBI	RT	Acute cold	Acclim cold	Uptake in cold			MIBI	RT	Acute cold	Acclim cold	Uptake in cold			MIBI	RT	Acute cold	Acclim cold	Uptake in cold			MIBI	RT	Acute cold	Acclim cold	Uptake in cold
Rat1	0.307584	0.347328	0.404352	0.281664			Rat1	1.20874e-09	2.01767e-09	1.57993e-09	1.68603e-09			Rat1	3.7179e-10	7.00792e-10	6.38847e-10	4.74895e-10			vs RT		0.981636	0.0684561	0.015884			vs RT		0.0225254	0.528824	0.101938			vs RT		0.149151	0.00795344	0.0449208
Rat2	0.252288	0.23328	0.428544	0.435456			Rat2	2.50713e-09	3.48551e-09	2.07733e-09	2.53345e-09			Rat2	6.3252e-10	8.131e-10	8.90226e-10	1.1032e-09			vs acute			0.0938581	0.0244261			vs acute			0.365485	0.824784			vs acute			0.162722	0.0896362
Rat3	0.183168	0.162432	0.214272	0.463104			Rat3	2.42233e-09	3.37782e-09	3.47831e-09	4.02494e-09			Rat3	4.43694e-10	5.48666e-10	7.45304e-10	1.86396e-09			vs acclim				0.392669			vs acclim				0.367733			vs acclim				0.162913
Rat4	0.16416	0.169344	0.38016	0.497664			Rat4	2.37877e-09	2.62215e-09	2.29344e-09	3.8657e-09			Rat4	3.90499e-10	4.44046e-10	8.71874e-10	1.92382e-09
Average	0.2268	0.228096	0.356832	0.419472			Average	2.12924e-09	2.87579e-09	2.35725e-09	3.02753e-09			Average	4.59626e-10	6.26651e-10	7.86563e-10	1.34147e-09
SEM	0.0329181	0.042824	0.0485355	0.0476658			SEM	3.0799e-10	3.44542e-10	4.02433e-10	5.58352e-10			SEM	5.96099e-11	8.14896e-11	5.88404e-11	3.43979e-10
4-I-Phe	RT	Acute cold	Acclim cold				4-I-Phe	RT	Acute cold	Acclim cold				4-I-Phe	RT	Acute cold	Acclim cold	Uptake in cold			4-I-Phe	RT	Acute cold	Acclim cold	Uptake in cold			4-I-Phe	RT	Acute cold	Acclim cold	Uptake in cold			4-I-Phe	RT	Acute cold	Acclim cold	Uptake in cold
Rat1							Rat1	1.36873e-09	1.09289e-09	1.299e-09				Rat1							vs RT							vs RT		0.564515	0.415669				vs RT
Rat2							Rat2	1.3123e-09	1.26121e-09					Rat2							vs acute							vs acute			0.970905				vs acute
Rat3							Rat3	1.47903e-09	1.552e-09	1.30958e-09				Rat3							vs acclim							vs acclim							vs acclim
Rat4							Rat4	1.28842e-09	1.28895e-09					Rat4
Average							Average	1.36212e-09	1.29876e-09	1.30429e-09				Average
SEM							SEM	4.24501e-11	9.48778e-11	3.74226e-12				SEM
FTHA	RT	Acute cold	Acclim cold	Uptake in cold			FTHA	RT	Acute cold	Acclim cold	Uptake in cold			FTHA	RT	Acute cold	Acclim cold	Uptake in cold			FTHA	RT	Acute cold	Acclim cold	Uptake in cold			FTHA	RT	Acute cold	Acclim cold	Uptake in cold			FTHA	RT	Acute cold	Acclim cold	Uptake in cold
Rat1		0.600809	0.692094	0.984444			Rat1		1.72515	2.39607	2.6862			Rat1		1.03649	1.65831	2.64442			vs RT		0.00223773	0.00379948	0.0670566			vs RT		0.0290942	0.0616961	0.0172921			vs RT		0.0160261	0.00805932	0.0750212
Rat2	0.214788	0.665246	0.677178	0.550095			Rat2	0.814985	2.52734	1.39924	1.7359			Rat2	0.175049	1.6813	0.947534	0.954912			vs acute			0.0583208	0.857768			vs acute			0.310474	0.55721			vs acute			0.996547	0.794955
Rat3		0.513104	0.874067	0.567398			Rat3			1.56916	2.22884			Rat3			1.37155	1.26464			vs acclim				0.291465			vs acclim				0.123947			vs acclim				0.761071
Rat4	0.187939	0.689708	0.938503	0.459407			Rat4	1.02709	2.17684	1.75124	2.7892			Rat4	0.19303	1.50138	1.64355	1.28138
Average	0.201364	0.617217	0.795461	0.640336			Average	0.921036	2.14311	1.77893	2.36004			Average	0.184039	1.40639	1.40524	1.53634
SEM	0.00949237	0.0394444	0.0653934	0.117121			SEM	0.0749895	0.201079	0.217907	0.241061			SEM	0.00635733	0.16637	0.166198	0.376909
Total
	Room Temp	Acute cold	Acclim cold	Uptake in cold		SEM	RT	Acute cold	Acclim cold	Uptake in cold
FDG	0.479286	0.891691	1.70931	1.77968		FDG	0.090991	0.114988	0.516626	0.661953
MIBG	0.0764657	0.462739	0.793872	0.535517		MIBG	0.0373658	0.0575156	0.122339	0.0184167
MIBI	0.42929	0.585292	0.73465	1.25293		MIBI	0.0596099	0.0814896	0.0588404	0.343979
4-I-Phe						4-I-Phe
FTHA	0.184039	1.40639	1.40524	1.53634		FTHA	0.00635733	0.16637	0.166198	0.376909
brown iBAT	0.70205	0.70205	1.15626	1.15626			0.0674192	0.0674192	0.100298	0.100298
white iBAT	0.65255	0.65255	0.506343	0.506343			0.0844471	0.0844471	0.0567328	0.0567328
AVG
	Room Temp	Acute cold	Acclim cold	Uptake in cold		SEM	RT	Acute cold	Acclim cold	Uptake in cold
FDG	1	1.86046	3.56637	3.71319		FDG	0.189847	0.239915	1.07791	1.38112
MIBG	1	6.05159	10.3821	7.00336		MIBG	0.488661	0.752175	1.59992	0.240849
MIBI	1	1.36339	1.71131	2.91862		MIBI	0.138857	0.189824	0.137064	0.801273
4-I-Phe	1	1	1	1		4-I-Phe	0	0	0	0
FTHA	1	7.64179	7.63551	8.34787		FTHA	0.0345433	0.903989	0.903059	2.04798
brown iBAT	1			1.64697			0.0960319			0.142864
white iBAT	1			0.775945			0.129411			0.0869401
AVG volume
	Room Temp	Acute cold	Acclim cold	Uptake in cold		SEM	RT	Acute cold	Acclim cold	Uptake in cold
FDG	0.327104	0.348583	0.592611	0.543818		FDG	0.0731978	0.119868	0.0611273	0.0263271
MIBG	0.0770987	0.14968	0.40608	0.29664		MIBG	0.0180624	0.023559	0.0545074	0.0250759
MIBI	0.2268	0.228096	0.356832	0.419472		MIBI	0.0329181	0.042824	0.0485355	0.0476658
4-I-Phe						4-I-Phe
FTHA	0.201364	0.617217	0.795461	0.640336		FTHA	0.00949237	0.0394444	0.0653934	0.117121
brown iBAT	0.70205			1.15626			0.0674192	0.0674192	0.100298	0.100298
white iBAT	0.65255			0.506343			0.0844471	0.0844471	0.0567328	0.0567328
AVG
	Room Temp	Acute cold	Acclim cold	Uptake in cold		SEM	RT	Acute cold	Acclim cold	Uptake in cold
FDG	1	1.06566	1.81169	1.66252		FDG	0.223775	0.366452	0.186874	0.0804853
MIBG	1	1.94141	5.26702	3.84754		MIBG	0.234277	0.30557	0.706982	0.325244
MIBI	1	1.00571	1.57333	1.84952		MIBI	0.145142	0.188818	0.214001	0.210166
4-I-Phe	1	1	1	1		4-I-Phe	0	0	0	0
FTHA	1	3.06519	3.95037	3.18		FTHA	0.0471405	0.195886	0.324753	0.581641
brown iBAT	1			1.64697			0.0960319			0.142864
white iBAT	1			0.775945			0.129411			0.0869401
AVG SUV
	Room Temp	Acute cold	Acclim cold	Uptake in cold		SEM	RT	Acute cold	Acclim cold	Uptake in cold
FDG	1.53952	3.24118	3.10356	3.2256		FDG	0.256664	0.878577	1.39229	1.51098
MIBG	0.856664	3.15361	2.0589	1.82059		MIBG	0.235256	0.196929	0.417201	0.120855
MIBI	1.98871	2.68599	2.20167	2.82771		MIBI	0.30799	0.344542	0.402433	0.558352
4-I-Phe	1.27222	1.21305	1.2182			4-I-Phe	0.0424501	0.0948778	0.00374226
FTHA	0.921036	2.14311	1.77893	2.36004		FTHA	0.0749895	0.201079	0.217907	0.241061
AVG
	Room Temp	Acute cold	Acclim cold	Uptake in cold		SEM	RT	Acute cold	Acclim cold	Uptake in cold
FDG	1	2.10532	2.01592	2.09519		FDG	0.166716	0.570681	0.904366	0.981463
MIBG	1	3.68127	2.40339	2.12521		MIBG	0.274619	0.229879	0.487007	0.141076
MIBI	1	1.35061	1.10708	1.42188		MIBI	0.154869	0.173248	0.202358	0.28076
4-I-Phe	1	0.953486	0.957542			4-I-Phe	0.0333669	0.0745765	0.00294152	#DIV/0!
FTHA	1	2.32685	1.93144	2.56237		FTHA	0.0814186	0.218319	0.236589	0.261729

## Sheet: Blad1
												Conversiefactor		934000000
												u-SPECT ==> Bq
BAT volume on uPET/uSPECT (in cc)								BAT SUV on uPET/uSPECT (in cc)							Total metabolic BAT activity						p-values on volume							p-values on SUV							p-values on total metabolic activity
FDG	RT	Acute cold	Acclim cold	Uptake in cold			FDG	RT	Acute cold	Acclim cold	Uptake in cold			FDG	RT	Acute cold	Acclim cold	Uptake in cold			FDG	RT	Acute cold	Acclim cold	Uptake in cold			FDG	RT	Acute cold	Acclim cold	Uptake in cold			FDG	RT	Acute cold	Acclim cold	Uptake in cold
Rat1	0.263115	0.195696	0.706413	0.53697			Rat1	1.17156	5.26939	0.880755	2.19979			Rat1	0.308254	1.0312	0.622177	1.18122			vs RT		0.883468	0.0213947	0.0191521			vs RT		0.11236	0.221611	0.234478			vs RT		0.0306561	0.0574662	0.0995851
Rat2	0.205838	0.247006	0.495205	0.523844			Rat2	1.64883	2.21789	6.22699	6.62694			Rat2	0.339392	0.547833	3.08364	3.47148			vs acute			0.184979	0.176769			vs acute			0.9404	0.98174			vs acute			0.173344	0.234433
Rat3	0.300703	0.245216	0.613935	0.452248			Rat3	2.22099	4.07982	2.20293	0.850064			Rat3	0.667859	1.00044	1.35246	0.384439			vs acclim				0.465962			vs acclim				0.965398			vs acclim				0.935941
Rat4	0.538759	0.706413	0.554892	0.662209			Rat4	1.11671	1.39762	3.20598	3.14338				0.60164	0.987297	1.77898	2.08157
Average	0.327104	0.348583	0.592611	0.543818			Average	1.53952	3.24118	3.10356	3.2256			Average	0.479286	0.891691	1.70931	1.77968
SEM	0.0731978	0.119868	0.0611273	0.0263271			SEM	0.256664	0.878577	1.39229	1.51098			SEM	0.090991	0.114988	0.516626	0.661953
MIBG	RT	Acute cold	Acclim cold	Uptake in cold			MIBG	RT	Acute cold	Acclim cold	Uptake in cold			MIBG	RT	Acute cold	Acclim cold	Uptake in cold			MIBG	RT	Acute cold	Acclim cold	Uptake in cold			MIBG	RT	Acute cold	Acclim cold	Uptake in cold			MIBG	RT	Acute cold	Acclim cold	Uptake in cold
Rat1	0.115008	0.115968	0.528768	0.35424			Rat1	1.44316e-09	3.55523e-09	1.64596e-09	1.67755e-09			Rat1	1.65975e-10	4.12293e-10	8.7033e-10	5.94257e-10			vs RT		0.078399	0.00438263	0.00354117			vs RT		0.000643846	0.0640675	0.0120817			vs RT		0.00301817	0.00361921	0.000517041
Rat2	0.073216	0.143232	0.435456				Rat2	7.72127e-10	3.05545e-09	2.62436e-09	1.90986e-09			Rat2	5.65321e-11	4.37638e-10	1.14279e-09				vs acute			0.00499419	0.0105382			vs acute			0.0440477	0.000827668			vs acute			0.0394503	0.318391
Rat3	0.043072	0.218112	0.393984	0.262656			Rat3	5.36307e-10	3.04741e-09	1.38173e-09	2.26528e-09			Rat3	2.30998e-11	6.64678e-10	5.44381e-10	5.9499e-10			vs acclim				0.173032			vs acclim				0.578344			vs acclim				0.116365
Rat4		0.121408	0.266112	0.273024			Rat4		3.84773e-09	3.16548e-09	1.94426e-09			Rat4		4.67145e-10	8.42373e-10	5.30829e-10
Average	0.0770987	0.14968	0.40608	0.29664			Average	9.17199e-10	3.37645e-09	2.20438e-09	1.94924e-09			Average	8.18691e-11	4.95438e-10	8.4997e-10	5.73359e-10
SEM	0.0180624	0.023559	0.0545074	0.0250759			SEM	2.35256e-10	1.96929e-10	4.17201e-10	1.20855e-10			SEM	3.73658e-11	5.75156e-11	1.22339e-10	1.84167e-11
MIBI	RT	Acute cold	Acclim cold	Uptake in cold			MIBI	RT	Acute cold	Acclim cold	Uptake in cold			MIBI	RT	Acute cold	Acclim cold	Uptake in cold			MIBI	RT	Acute cold	Acclim cold	Uptake in cold			MIBI	RT	Acute cold	Acclim cold	Uptake in cold			MIBI	RT	Acute cold	Acclim cold	Uptake in cold
Rat1	0.307584	0.347328	0.404352	0.281664			Rat1	1.20874e-09	2.01767e-09	1.57993e-09	1.68603e-09			Rat1	3.7179e-10	7.00792e-10	6.38847e-10	4.74895e-10			vs RT		0.981636	0.0684561	0.015884			vs RT		0.0225254	0.528824	0.101938			vs RT		0.149151	0.00795344	0.0449208
Rat2	0.252288	0.23328	0.428544	0.435456			Rat2	2.50713e-09	3.48551e-09	2.07733e-09	2.53345e-09			Rat2	6.3252e-10	8.131e-10	8.90226e-10	1.1032e-09			vs acute			0.0938581	0.0244261			vs acute			0.365485	0.824784			vs acute			0.162722	0.0896362
Rat3	0.183168	0.162432	0.214272	0.463104			Rat3	2.42233e-09	3.37782e-09	3.47831e-09	4.02494e-09			Rat3	4.43694e-10	5.48666e-10	7.45304e-10	1.86396e-09			vs acclim				0.392669			vs acclim				0.367733			vs acclim				0.162913
Rat4	0.16416	0.169344	0.38016	0.497664			Rat4	2.37877e-09	2.62215e-09	2.29344e-09	3.8657e-09			Rat4	3.90499e-10	4.44046e-10	8.71874e-10	1.92382e-09
Average	0.2268	0.228096	0.356832	0.419472			Average	2.12924e-09	2.87579e-09	2.35725e-09	3.02753e-09			Average	4.59626e-10	6.26651e-10	7.86563e-10	1.34147e-09
SEM	0.0329181	0.042824	0.0485355	0.0476658			SEM	3.0799e-10	3.44542e-10	4.02433e-10	5.58352e-10			SEM	5.96099e-11	8.14896e-11	5.88404e-11	3.43979e-10
4-I-Phe	RT	Acute cold	Acclim cold				4-I-Phe	RT	Acute cold	Acclim cold				4-I-Phe	RT	Acute cold	Acclim cold	Uptake in cold			4-I-Phe	RT	Acute cold	Acclim cold	Uptake in cold			4-I-Phe	RT	Acute cold	Acclim cold	Uptake in cold			4-I-Phe	RT	Acute cold	Acclim cold	Uptake in cold
Rat1							Rat1	1.36873e-09	1.09289e-09	1.299e-09				Rat1							vs RT							vs RT		0.564515	0.415669				vs RT
Rat2							Rat2	1.3123e-09	1.26121e-09					Rat2							vs acute							vs acute			0.970905				vs acute
Rat3							Rat3	1.47903e-09	1.552e-09	1.30958e-09				Rat3							vs acclim							vs acclim							vs acclim
Rat4							Rat4	1.28842e-09	1.28895e-09					Rat4
Average							Average	1.36212e-09	1.29876e-09	1.30429e-09				Average
SEM							SEM	4.24501e-11	9.48778e-11	3.74226e-12				SEM
FTHA	RT	Acute cold	Acclim cold	Uptake in cold			FTHA	RT	Acute cold	Acclim cold	Uptake in cold			FTHA	RT	Acute cold	Acclim cold	Uptake in cold			FTHA	RT	Acute cold	Acclim cold	Uptake in cold			FTHA	RT	Acute cold	Acclim cold	Uptake in cold			FTHA	RT	Acute cold	Acclim cold	Uptake in cold
Rat1		0.600809	0.692094	0.984444			Rat1		1.72515	2.39607	2.6862			Rat1		1.03649	1.65831	2.64442			vs RT		0.00223773	0.00379948	0.0670566			vs RT		0.0290942	0.0616961	0.0172921			vs RT		0.0160261	0.00805932	0.0750212
Rat2	0.214788	0.665246	0.677178	0.550095			Rat2	0.814985	2.52734	1.39924	1.7359			Rat2	0.175049	1.6813	0.947534	0.954912			vs acute			0.0583208	0.857768			vs acute			0.310474	0.55721			vs acute			0.996547	0.794955
Rat3		0.513104	0.874067	0.567398			Rat3			1.56916	2.22884			Rat3			1.37155	1.26464			vs acclim				0.291465			vs acclim				0.123947			vs acclim				0.761071
Rat4	0.187939	0.689708	0.938503	0.459407			Rat4	1.02709	2.17684	1.75124	2.7892			Rat4	0.19303	1.50138	1.64355	1.28138
Average	0.201364	0.617217	0.795461	0.640336			Average	0.921036	2.14311	1.77893	2.36004			Average	0.184039	1.40639	1.40524	1.53634
SEM	0.00949237	0.0394444	0.0653934	0.117121			SEM	0.0749895	0.201079	0.217907	0.241061			SEM	0.00635733	0.16637	0.166198	0.376909
Total
	Room Temp	Acute cold	Acclim cold	Uptake in cold		SEM	RT	Acute cold	Acclim cold	Uptake in cold
FDG	0.479286	0.891691	1.70931	1.77968		FDG	0.090991	0.114988	0.516626	0.661953
MIBG	0.0764657	0.462739	0.793872	0.535517		MIBG	0.0373658	0.0575156	0.122339	0.0184167
MIBI	0.42929	0.585292	0.73465	1.25293		MIBI	0.0596099	0.0814896	0.0588404	0.343979
4-I-Phe						4-I-Phe
FTHA	0.184039	1.40639	1.40524	1.53634		FTHA	0.00635733	0.16637	0.166198	0.376909
brown iBAT	0.70205	0.70205	1.15626	1.15626			0.0674192	0.0674192	0.100298	0.100298
white iBAT	0.65255	0.65255	0.506343	0.506343			0.0844471	0.0844471	0.0567328	0.0567328
AVG
	Room Temp	Acute cold	Acclim cold	Uptake in cold		SEM	RT	Acute cold	Acclim cold	Uptake in cold
FDG	1	1.86046	3.56637	3.71319		FDG	0.189847	0.239915	1.07791	1.38112
MIBG	1	6.05159	10.3821	7.00336		MIBG	0.488661	0.752175	1.59992	0.240849
MIBI	1	1.36339	1.71131	2.91862		MIBI	0.138857	0.189824	0.137064	0.801273
4-I-Phe	1	1	1	1		4-I-Phe	0	0	0	0
FTHA	1	7.64179	7.63551	8.34787		FTHA	0.0345433	0.903989	0.903059	2.04798
brown iBAT	1			1.64697			0.0960319			0.142864
white iBAT	1			0.775945			0.129411			0.0869401
AVG volume
	Room Temp	Acute cold	Acclim cold	Uptake in cold		SEM	RT	Acute cold	Acclim cold	Uptake in cold
FDG	0.327104	0.348583	0.592611	0.543818		FDG	0.0731978	0.119868	0.0611273	0.0263271
MIBG	0.0770987	0.14968	0.40608	0.29664		MIBG	0.0180624	0.023559	0.0545074	0.0250759
MIBI	0.2268	0.228096	0.356832	0.419472		MIBI	0.0329181	0.042824	0.0485355	0.0476658
4-I-Phe						4-I-Phe
FTHA	0.201364	0.617217	0.795461	0.640336		FTHA	0.00949237	0.0394444	0.0653934	0.117121
brown iBAT	0.70205			1.15626			0.0674192	0.0674192	0.100298	0.100298
white iBAT	0.65255			0.506343			0.0844471	0.0844471	0.0567328	0.0567328
AVG
	Room Temp	Acute cold	Acclim cold	Uptake in cold		SEM	RT	Acute cold	Acclim cold	Uptake in cold
FDG	1	1.06566	1.81169	1.66252		FDG	0.223775	0.366452	0.186874	0.0804853
MIBG	1	1.94141	5.26702	3.84754		MIBG	0.234277	0.30557	0.706982	0.325244
MIBI	1	1.00571	1.57333	1.84952		MIBI	0.145142	0.188818	0.214001	0.210166
4-I-Phe	1	1	1	1		4-I-Phe	0	0	0	0
FTHA	1	3.06519	3.95037	3.18		FTHA	0.0471405	0.195886	0.324753	0.581641
brown iBAT	1			1.64697			0.0960319			0.142864
white iBAT	1			0.775945			0.129411			0.0869401
AVG SUV
	Room Temp	Acute cold	Acclim cold	Uptake in cold		SEM	RT	Acute cold	Acclim cold	Uptake in cold
FDG	1.53952	3.24118	3.10356	3.2256		FDG	0.256664	0.878577	1.39229	1.51098
MIBG	0.856664	3.15361	2.0589	1.82059		MIBG	0.235256	0.196929	0.417201	0.120855
MIBI	1.98871	2.68599	2.20167	2.82771		MIBI	0.30799	0.344542	0.402433	0.558352
4-I-Phe	1.27222	1.21305	1.2182			4-I-Phe	0.0424501	0.0948778	0.00374226
FTHA	0.921036	2.14311	1.77893	2.36004		FTHA	0.0749895	0.201079	0.217907	0.241061
AVG
	Room Temp	Acute cold	Acclim cold	Uptake in cold		SEM	RT	Acute cold	Acclim cold	Uptake in cold
FDG	1	2.10532	2.01592	2.09519		FDG	0.166716	0.570681	0.904366	0.981463
MIBG	1	3.68127	2.40339	2.12521		MIBG	0.274619	0.229879	0.487007	0.141076
MIBI	1	1.35061	1.10708	1.42188		MIBI	0.154869	0.173248	0.202358	0.28076
4-I-Phe	1	0.953486	0.957542			4-I-Phe	0.0333669	0.0745765	0.00294152	#DIV/0!
FTHA	1	2.32685	1.93144	2.56237		FTHA	0.0814186	0.218319	0.236589	0.261729

## Sheet: weights
WARM animal			Cold animal
white iBAT	brown iBAT		white iBAT	brown iBAT
0.7478	0.5945		0.4847	1.1494				0.142603	0.0137942
0.76	0.5657		0.6021	0.8558
0.633	0.9373		0.7038	1.3584
0.4694	0.7107		0.6461	1.3193
			0.2929	1.1108
			0.4381	1.5124
			0.3767	0.7877
0.65255	0.70205		0.506343	1.15626
0.0674192	0.0844471		0.0567328	0.100298
